# Supplementary material
Source: Springer Nature journal article supplement (https://www.springermedizin.de/resource/supplementary/12891_2012_1437_MOESM4_ESM.pdf/9508348)
Supplement: MOESM4 [file 9508348]

# *8-year Prospective Cohort Study*

Health Outcomes Assessment Team

Job Exposure  
Assessment Team

## **Baseline Health Data Collection**

- Questionnaire
- Structured Interview
- Two Standardized Physical Examinations
- Nerve Conduction Study

## **Baseline Job Data Collection**

- Worker Data (interview)
- Job Specific Data
  - Worker interview
  - Measurements
  - Observation
  - Video capture of all tasks
- Analysis of video by independent raters
  - Posture, Repetition, RPE

## **Monthly Follow-up Health Data Collection**

- Structured Interview
- Standardized Physical Examination

## **Quarterly Follow-up Job Data Collection**

- Interview Worker
- Collect data on new jobs or any job changes

## **Semi-Annual Health Data Collection**

- Nerve Conduction Study  
(All workers with Tingling/Numbness for at least 2 consecutive months)

## **Exit Health Data collection**

- Questionnaire
- Structured Interview
- Physical Examination
- Nerve Conduction Study
